# Supplementary material
Source: publisher figshare collection journal article supplement (https://acs.figshare.com/ndownloader/files/24692682)
Supplement: Supplementary file 1 [file 24692682]

## Sheet: Cover Page
The G-quadruplex helicase DHX36/G4R1 engages nuclear lamina proteins in quiescent breast cancer cells.
Adam. E. Richardson1, Zachary. A. Zentz1, Antonio E. Chambers1, Siara N. Sandwith1, Michael A. Reisinger1, Destinee W. Saunders1, Joshua D. Tompkins2, Arthur D. Riggs2, Eric D. Routh3, Eric. M. Rubenstein1, Melissa A. Smaldino1, James P. Vaughn4, Robert A. Haney1,*, Philip J. Smaldino1,*
1Ball State University, Department of Biology, Muncie, IN
2City of Hope, Department of Diabetes Complications & Metabolism, Duarte, CA
3University of North Carolina – Chapel Hill, Lineberger Comprehensive Cancer Center, Chapel Hill, NC
4NanoMedica, LLC. Winston-Salem, NC
The authors wish it to be known that the first two authors contributed equally.
*corresponding author

## Sheet: Table S1
Supplementary Table 1. Proteins identified in replicates of fed and starved treatments, with membership in expression categories and descriptions. Columns C-D in bold denote proteins expressed in both fed replicates, while underlined values in columns E-F denote proteins expressed in both straved replicates.
		Normailzed Spectra for Treatments				Expression Category					Grouped protein UniProt accessions
Accession Number	MW	38816-Fed	38817-Fed	38818-Starved	38819-Starved	Fed Excl.	Starved Excl.	3x Fed	3x Starved	Description
sp|Q15582|BGH3_HUMAN	75 kDa	235.98	350.89	291.13	587.63					Transforming growth factor-beta-induced protein ig-h3 OS=Homo sapiens OX=9606 GN=TGFBI PE=1 SV=1
sp|Q15149|PLEC_HUMAN	532 kDa	130.48	113.9	123.14	0					Plectin OS=Homo sapiens OX=9606 GN=PLEC PE=1 SV=3
sp|A0A075B6S2|KVD29_HUMAN (+2)	13 kDa	20.128	37.966	45.737	141.03				X	Immunoglobulin kappa variable 2D-29 OS=Homo sapiens OX=9606 GN=IGKV2D-29 PE=3 SV=1	KVD26_HUMAN, KV229_HUMAN
sp|P07996|TSP1_HUMAN	129 kDa	44.42	57.524	48.376	61.476					Thrombospondin-1 OS=Homo sapiens OX=9606 GN=THBS1 PE=1 SV=2
sp|P02751|FINC_HUMAN	263 kDa	28.457	32.213	39.58	34.354					Fibronectin OS=Homo sapiens OX=9606 GN=FN1 PE=1 SV=4
sp|P02545|LMNA_HUMAN	74 kDa	9.7169	2.3009	73.883	130.18				X	Prelamin-A/C OS=Homo sapiens OX=9606 GN=LMNA PE=1 SV=1
sp|P68371|TBB4B_HUMAN	50 kDa	34.703	51.771	36.062	32.546					Tubulin beta-4B chain OS=Homo sapiens OX=9606 GN=TUBB4B PE=1 SV=1
sp|P21333|FLNA_HUMAN	281 kDa	46.502	34.514	22.868	0			X		Filamin-A OS=Homo sapiens OX=9606 GN=FLNA PE=1 SV=4
sp|Q9H2U1|DHX36_HUMAN	115 kDa	21.516	11.505	39.58	61.476				X	ATP-dependent DNA/RNA helicase DHX36 OS=Homo sapiens OX=9606 GN=DHX36 PE=1 SV=2
sp|Q9H3U1|UN45A_HUMAN	103 kDa	31.233	29.912	18.471	9.0405					Protein unc-45 homolog A OS=Homo sapiens OX=9606 GN=UNC45A PE=1 SV=1
sp|P68363|TBA1B_HUMAN (+1)	50 kDa	18.74	25.31	19.35	36.162					Tubulin alpha-1B chain OS=Homo sapiens OX=9606 GN=TUBA1B PE=1 SV=1	TBA1A_HUMAN
sp|P09486|SPRC_HUMAN	35 kDa	14.575	21.859	15.832	21.697					SPARC OS=Homo sapiens OX=9606 GN=SPARC PE=1 SV=1
sp|P68032|ACTC_HUMAN	42 kDa	151.31	234.7	97.631	106.68					Actin, alpha cardiac muscle 1 OS=Homo sapiens OX=9606 GN=ACTC1 PE=1 SV=1
sp|P11940|PABP1_HUMAN	71 kDa	10.411	13.806	17.591	5.4243					Polyadenylate-binding protein 1 OS=Homo sapiens OX=9606 GN=PABPC1 PE=1 SV=2
sp|P05121|PAI1_HUMAN	45 kDa	15.269	25.31	9.6751	9.0405					Plasminogen activator inhibitor 1 OS=Homo sapiens OX=9606 GN=SERPINE1 PE=1 SV=1
sp|P58107|EPIPL_HUMAN	556 kDa	18.046	16.107	27.266	0					Epiplakin OS=Homo sapiens OX=9606 GN=EPPK1 PE=1 SV=3
sp|P20700|LMNB1_HUMAN	66 kDa	0	0	29.025	37.97		X			Lamin-B1 OS=Homo sapiens OX=9606 GN=LMNB1 PE=1 SV=2
sp|P50402|EMD_HUMAN	29 kDa	5.5525	9.2038	21.109	41.586				X	Emerin OS=Homo sapiens OX=9606 GN=EMD PE=1 SV=1
sp|Q99969|RARR2_HUMAN	19 kDa	13.187	0	0	0					Retinoic acid receptor responder protein 2 OS=Homo sapiens OX=9606 GN=RARRES2 PE=1 SV=1
sp|Q9NVI7|ATD3A_HUMAN	71 kDa	5.5525	10.354	21.109	16.273					ATPase family AAA domain-containing protein 3A OS=Homo sapiens OX=9606 GN=ATAD3A PE=1 SV=2
sp|Q9NYL9|TMOD3_HUMAN	40 kDa	10.411	11.505	11.434	0					Tropomodulin-3 OS=Homo sapiens OX=9606 GN=TMOD3 PE=1 SV=1
sp|P83111|LACTB_HUMAN	61 kDa	11.105	9.2038	12.314	0					Serine beta-lactamase-like protein LACTB, mitochondrial OS=Homo sapiens OX=9606 GN=LACTB PE=1 SV=2
sp|P42166|LAP2A_HUMAN	75 kDa	3.4703	0	19.35	30.738				X	Lamina-associated polypeptide 2, isoform alpha OS=Homo sapiens OX=9606 GN=TMPO PE=1 SV=2
sp|P47756|CAPZB_HUMAN	31 kDa	11.799	13.806	9.6751	9.0405					F-actin-capping protein subunit beta OS=Homo sapiens OX=9606 GN=CAPZB PE=1 SV=4
sp|P01024|CO3_HUMAN	187 kDa	7.6347	11.505	7.916	9.0405					Complement C3 OS=Homo sapiens OX=9606 GN=C3 PE=1 SV=2
sp|P0DOX5|IGG1_HUMAN	49 kDa	8.3288	6.9028	8.7956	9.0405					Immunoglobulin gamma-1 heavy chain OS=Homo sapiens OX=9606 PE=1 SV=2
sp|P62979|RS27A_HUMAN	18 kDa	7.6347	5.7524	6.1569	0					Ubiquitin-40S ribosomal protein S27a OS=Homo sapiens OX=9606 GN=RPS27A PE=1 SV=2
sp|Q14257|RCN2_HUMAN	37 kDa	11.799	5.7524	19.35	3.6162					Reticulocalbin-2 OS=Homo sapiens OX=9606 GN=RCN2 PE=1 SV=1
sp|O75369|FLNB_HUMAN	278 kDa	24.986	12.655	3.5182	0			X		Filamin-B OS=Homo sapiens OX=9606 GN=FLNB PE=1 SV=2
sp|P0DP23|CALM1_HUMAN (+2)	17 kDa	9.0228	16.107	14.073	9.0405					Calmodulin-1 OS=Homo sapiens OX=9606 GN=CALM1 PE=1 SV=1	CALM2_HUMAN, CALM3_HUMAN
sp|P30050|RL12_HUMAN	18 kDa	6.9406	11.505	10.555	19.889					60S ribosomal protein L12 OS=Homo sapiens OX=9606 GN=RPL12 PE=1 SV=1
sp|P52907|CAZA1_HUMAN	33 kDa	6.2466	8.0533	3.5182	7.2324					F-actin-capping protein subunit alpha-1 OS=Homo sapiens OX=9606 GN=CAPZA1 PE=1 SV=3
sp|P62249|RS16_HUMAN	16 kDa	7.6347	11.505	11.434	3.6162					40S ribosomal protein S16 OS=Homo sapiens OX=9606 GN=RPS16 PE=1 SV=2
sp|P52597|HNRPF_HUMAN	46 kDa	9.0228	6.9028	9.6751	3.6162					Heterogeneous nuclear ribonucleoprotein F OS=Homo sapiens OX=9606 GN=HNRNPF PE=1 SV=3
sp|P08123|CO1A2_HUMAN	129 kDa	4.1644	12.655	11.434	0					Collagen alpha-2(I) chain OS=Homo sapiens OX=9606 GN=COL1A2 PE=1 SV=7
sp|P12814|ACTN1_HUMAN	103 kDa	6.9406	2.3009	7.916	0					Alpha-actinin-1 OS=Homo sapiens OX=9606 GN=ACTN1 PE=1 SV=2
sp|P61978|HNRPK_HUMAN	51 kDa	6.2466	5.7524	8.7956	7.2324					Heterogeneous nuclear ribonucleoprotein K OS=Homo sapiens OX=9606 GN=HNRNPK PE=1 SV=1
sp|P31943|HNRH1_HUMAN	49 kDa	5.5525	6.9028	6.1569	0					Heterogeneous nuclear ribonucleoprotein H OS=Homo sapiens OX=9606 GN=HNRNPH1 PE=1 SV=4
sp|Q9BUP0|EFHD1_HUMAN	27 kDa	5.5525	12.655	5.2773	3.6162					EF-hand domain-containing protein D1 OS=Homo sapiens OX=9606 GN=EFHD1 PE=1 SV=1
sp|P05388|RLA0_HUMAN	34 kDa	2.7763	6.9028	6.1569	3.6162					60S acidic ribosomal protein P0 OS=Homo sapiens OX=9606 GN=RPLP0 PE=1 SV=1
sp|P06748|NPM_HUMAN	33 kDa	2.0822	3.4514	3.5182	5.4243					Nucleophosmin OS=Homo sapiens OX=9606 GN=NPM1 PE=1 SV=2
sp|O00468|AGRIN_HUMAN	217 kDa	6.9406	4.6019	4.3978	0					Agrin OS=Homo sapiens OX=9606 GN=AGRN PE=1 SV=6
sp|Q6ZRV2|FA83H_HUMAN	127 kDa	11.105	4.6019	7.916	0					Protein FAM83H OS=Homo sapiens OX=9606 GN=FAM83H PE=1 SV=3
sp|Q08380|LG3BP_HUMAN	65 kDa	4.8584	8.0533	7.0365	5.4243					Galectin-3-binding protein OS=Homo sapiens OX=9606 GN=LGALS3BP PE=1 SV=1
sp|P61160|ARP2_HUMAN	45 kDa	2.0822	0	0	0					Actin-related protein 2 OS=Homo sapiens OX=9606 GN=ACTR2 PE=1 SV=1
sp|P62888|RL30_HUMAN	13 kDa	4.1644	6.9028	5.2773	3.6162					60S ribosomal protein L30 OS=Homo sapiens OX=9606 GN=RPL30 PE=1 SV=2
sp|P60866|RS20_HUMAN	13 kDa	6.2466	4.6019	6.1569	5.4243					40S ribosomal protein S20 OS=Homo sapiens OX=9606 GN=RPS20 PE=1 SV=1
sp|P38567|HYALP_HUMAN	58 kDa	0	8.0533	7.0365	12.657					Hyaluronidase PH-20 OS=Homo sapiens OX=9606 GN=SPAM1 PE=1 SV=1
sp|P01033|TIMP1_HUMAN	23 kDa	4.1644	3.4514	6.1569	0					Metalloproteinase inhibitor 1 OS=Homo sapiens OX=9606 GN=TIMP1 PE=1 SV=1
sp|P01023|A2MG_HUMAN	163 kDa	2.7763	4.6019	6.1569	12.657					Alpha-2-macroglobulin OS=Homo sapiens OX=9606 GN=A2M PE=1 SV=3
sp|Q9BZF9|UACA_HUMAN	163 kDa	7.6347	0	2.6387	0					Uveal autoantigen with coiled-coil domains and ankyrin repeats OS=Homo sapiens OX=9606 GN=UACA PE=1 SV=2
sp|Q92841|DDX17_HUMAN	80 kDa	8.3288	2.3009	3.5182	0			X		Probable ATP-dependent RNA helicase DDX17 OS=Homo sapiens OX=9606 GN=DDX17 PE=1 SV=2
sp|Q16643|DREB_HUMAN	71 kDa	6.9406	0	3.5182	0					Drebrin OS=Homo sapiens OX=9606 GN=DBN1 PE=1 SV=4
sp|P25705|ATPA_HUMAN	60 kDa	4.1644	2.3009	6.1569	3.6162					ATP synthase subunit alpha, mitochondrial OS=Homo sapiens OX=9606 GN=ATP5F1A PE=1 SV=1
sp|Q12805|FBLN3_HUMAN	55 kDa	3.4703	6.9028	2.6387	3.6162					EGF-containing fibulin-like extracellular matrix protein 1 OS=Homo sapiens OX=9606 GN=EFEMP1 PE=1 SV=2
sp|Q96HS1|PGAM5_HUMAN	32 kDa	3.4703	5.7524	3.5182	0					Serine/threonine-protein phosphatase PGAM5, mitochondrial OS=Homo sapiens OX=9606 GN=PGAM5 PE=1 SV=2
sp|Q9UN81|LORF1_HUMAN	40 kDa	2.0822	2.3009	3.5182	0					LINE-1 retrotransposable element ORF1 protein OS=Homo sapiens OX=9606 GN=L1RE1 PE=1 SV=1
sp|Q96C19|EFHD2_HUMAN	27 kDa	5.5525	14.956	7.0365	0					EF-hand domain-containing protein D2 OS=Homo sapiens OX=9606 GN=EFHD2 PE=1 SV=1
sp|O43143|DHX15_HUMAN	91 kDa	4.1644	0	6.1569	3.6162					Pre-mRNA-splicing factor ATP-dependent RNA helicase DHX15 OS=Homo sapiens OX=9606 GN=DHX15 PE=1 SV=2
sp|P18077|RL35A_HUMAN	13 kDa	3.4703	4.6019	4.3978	0					60S ribosomal protein L35a OS=Homo sapiens OX=9606 GN=RPL35A PE=1 SV=2
sp|P49411|EFTU_HUMAN	50 kDa	4.1644	4.6019	2.6387	0			X		Elongation factor Tu, mitochondrial OS=Homo sapiens OX=9606 GN=TUFM PE=1 SV=2
sp|Q9UHB6|LIMA1_HUMAN	85 kDa	5.5525	2.3009	7.916	0					LIM domain and actin-binding protein 1 OS=Homo sapiens OX=9606 GN=LIMA1 PE=1 SV=1
sp|P01034|CYTC_HUMAN	16 kDa	0	0	8.7956	0					Cystatin-C OS=Homo sapiens OX=9606 GN=CST3 PE=1 SV=1
sp|Q13813|SPTN1_HUMAN	285 kDa	6.9406	0	0	0					Spectrin alpha chain, non-erythrocytic 1 OS=Homo sapiens OX=9606 GN=SPTAN1 PE=1 SV=3
sp|Q5T9A4|ATD3B_HUMAN	73 kDa	0	0	19.35	0					ATPase family AAA domain-containing protein 3B OS=Homo sapiens OX=9606 GN=ATAD3B PE=1 SV=1
sp|P42167|LAP2B_HUMAN	51 kDa	2.7763	0	14.073	30.738				X	Lamina-associated polypeptide 2, isoforms beta/gamma OS=Homo sapiens OX=9606 GN=TMPO PE=1 SV=2
sp|Q00610|CLH1_HUMAN	192 kDa	5.5525	0	1.7591	0					Clathrin heavy chain 1 OS=Homo sapiens OX=9606 GN=CLTC PE=1 SV=5
sp|P48729|KC1A_HUMAN	39 kDa	6.2466	0	0	0					Casein kinase I isoform alpha OS=Homo sapiens OX=9606 GN=CSNK1A1 PE=1 SV=2
sp|Q96N67|DOCK7_HUMAN	243 kDa	6.2466	0	0	0					Dedicator of cytokinesis protein 7 OS=Homo sapiens OX=9606 GN=DOCK7 PE=1 SV=4
sp|O60814|H2B1K_HUMAN (+7)	14 kDa	2.0822	0	7.916	9.0405				X	Histone H2B type 1-K OS=Homo sapiens OX=9606 GN=HIST1H2BK PE=1 SV=3	H2B1D_HUMAN, H2B1C_HUMAN, H2B2F_HUMAN, H2B1H_HUMAN, H2B1N_HUMAN, H2B1M_HUMAN, H2B1L_HUMAN
sp|P60842|IF4A1_HUMAN	46 kDa	4.1644	4.6019	2.6387	0			X		Eukaryotic initiation factor 4A-I OS=Homo sapiens OX=9606 GN=EIF4A1 PE=1 SV=1
sp|Q07955|SRSF1_HUMAN	28 kDa	1.3881	0	5.2773	0					Serine/arginine-rich splicing factor 1 OS=Homo sapiens OX=9606 GN=SRSF1 PE=1 SV=2
sp|P02765|FETUA_HUMAN	39 kDa	0	5.7524	0	0					Alpha-2-HS-glycoprotein OS=Homo sapiens OX=9606 GN=AHSG PE=1 SV=2
sp|P61353|RL27_HUMAN	16 kDa	4.1644	0	1.7591	0					60S ribosomal protein L27 OS=Homo sapiens OX=9606 GN=RPL27 PE=1 SV=2
sp|O00214|LEG8_HUMAN	36 kDa	4.8584	4.6019	2.6387	0			X		Galectin-8 OS=Homo sapiens OX=9606 GN=LGALS8 PE=1 SV=4
sp|Q96II8|LRCH3_HUMAN	86 kDa	7.6347	4.6019	0	0	X				Leucine-rich repeat and calponin homology domain-containing protein 3 OS=Homo sapiens OX=9606 GN=LRCH3 PE=1 SV=2
sp|O75531|BAF_HUMAN	10 kDa	0	0	4.3978	7.2324		X			Barrier-to-autointegration factor OS=Homo sapiens OX=9606 GN=BANF1 PE=1 SV=1
sp|P21266|GSTM3_HUMAN	27 kDa	1.3881	0	5.2773	3.6162				X	Glutathione S-transferase Mu 3 OS=Homo sapiens OX=9606 GN=GSTM3 PE=1 SV=3
sp|P59998|ARPC4_HUMAN	20 kDa	2.7763	4.6019	2.6387	0					Actin-related protein 2/3 complex subunit 4 OS=Homo sapiens OX=9606 GN=ARPC4 PE=1 SV=3
sp|Q69YQ0|CYTSA_HUMAN	125 kDa	5.5525	0	1.7591	0					Cytospin-A OS=Homo sapiens OX=9606 GN=SPECC1L PE=1 SV=2
sp|P68431|H31_HUMAN (+2)	15 kDa	0	0	1.7591	5.4243		X			Histone H3.1 OS=Homo sapiens OX=9606 GN=HIST1H3A PE=1 SV=2	H31T_HUMAN, H32_HUMAN
sp|O00299|CLIC1_HUMAN	27 kDa	2.7763	0	6.1569	0					Chloride intracellular channel protein 1 OS=Homo sapiens OX=9606 GN=CLIC1 PE=1 SV=4
sp|O14974|MYPT1_HUMAN	115 kDa	8.3288	2.3009	0	0	X				Protein phosphatase 1 regulatory subunit 12A OS=Homo sapiens OX=9606 GN=PPP1R12A PE=1 SV=1
sp|P17844|DDX5_HUMAN	69 kDa	7.6347	0	3.5182	0					Probable ATP-dependent RNA helicase DDX5 OS=Homo sapiens OX=9606 GN=DDX5 PE=1 SV=1
sp|O60701|UGDH_HUMAN	55 kDa	4.1644	3.4514	6.1569	0					UDP-glucose 6-dehydrogenase OS=Homo sapiens OX=9606 GN=UGDH PE=1 SV=1
sp|Q99996|AKAP9_HUMAN	453 kDa	0	0	1.7591	0					A-kinase anchor protein 9 OS=Homo sapiens OX=9606 GN=AKAP9 PE=1 SV=4
sp|Q92900|RENT1_HUMAN	124 kDa	2.7763	0	2.6387	0					Regulator of nonsense transcripts 1 OS=Homo sapiens OX=9606 GN=UPF1 PE=1 SV=2
sp|P18085|ARF4_HUMAN	21 kDa	0	0	4.3978	0					ADP-ribosylation factor 4 OS=Homo sapiens OX=9606 GN=ARF4 PE=1 SV=3
sp|P07225|PROS_HUMAN	75 kDa	0	0	2.6387	0					Vitamin K-dependent protein S OS=Homo sapiens OX=9606 GN=PROS1 PE=1 SV=1
sp|P18124|RL7_HUMAN	29 kDa	3.4703	3.4514	2.6387	0					60S ribosomal protein L7 OS=Homo sapiens OX=9606 GN=RPL7 PE=1 SV=1
sp|Q13137|CACO2_HUMAN	52 kDa	3.4703	2.3009	0	0	X				Calcium-binding and coiled-coil domain-containing protein 2 OS=Homo sapiens OX=9606 GN=CALCOCO2 PE=1 SV=1
sp|P62140|PP1B_HUMAN	37 kDa	3.4703	4.6019	0	0	X				Serine/threonine-protein phosphatase PP1-beta catalytic subunit OS=Homo sapiens OX=9606 GN=PPP1CB PE=1 SV=3
sp|Q01082|SPTB2_HUMAN	275 kDa	6.2466	0	0	0					Spectrin beta chain, non-erythrocytic 1 OS=Homo sapiens OX=9606 GN=SPTBN1 PE=1 SV=2
sp|P07237|PDIA1_HUMAN	57 kDa	0	2.3009	3.5182	5.4243				X	Protein disulfide-isomerase OS=Homo sapiens OX=9606 GN=P4HB PE=1 SV=3
sp|Q15154|PCM1_HUMAN	229 kDa	5.5525	2.3009	0	0	X				Pericentriolar material 1 protein OS=Homo sapiens OX=9606 GN=PCM1 PE=1 SV=5
sp|Q6ZVM7|TM1L2_HUMAN	56 kDa	4.8584	3.4514	0	0	X				TOM1-like protein 2 OS=Homo sapiens OX=9606 GN=TOM1L2 PE=1 SV=1
sp|P62258|1433E_HUMAN	29 kDa	0	0	5.2773	7.2324		X			14-3-3 protein epsilon OS=Homo sapiens OX=9606 GN=YWHAE PE=1 SV=1
sp|P51114|FXR1_HUMAN	70 kDa	3.4703	0	5.2773	0					Fragile X mental retardation syndrome-related protein 1 OS=Homo sapiens OX=9606 GN=FXR1 PE=1 SV=3
sp|P33993|MCM7_HUMAN	81 kDa	3.4703	0	1.7591	0					DNA replication licensing factor MCM7 OS=Homo sapiens OX=9606 GN=MCM7 PE=1 SV=4
sp|P0C0S8|H2A1_HUMAN (+4)	14 kDa	2.0822	0	5.2773	0					Histone H2A type 1 OS=Homo sapiens OX=9606 GN=HIST1H2AG PE=1 SV=2	H2A1D_HUMAN, H2A1H_HUMAN, H2A1J_HUMAN, H2AJ_HUMAN
sp|P62913|RL11_HUMAN	20 kDa	4.1644	4.6019	1.7591	0			X		60S ribosomal protein L11 OS=Homo sapiens OX=9606 GN=RPL11 PE=1 SV=2
sp|P19338|NUCL_HUMAN	77 kDa	3.4703	0	3.5182	0					Nucleolin OS=Homo sapiens OX=9606 GN=NCL PE=1 SV=3
sp|P52272|HNRPM_HUMAN	78 kDa	1.3881	0	3.5182	0					Heterogeneous nuclear ribonucleoprotein M OS=Homo sapiens OX=9606 GN=HNRNPM PE=1 SV=3
sp|P62906|RL10A_HUMAN	25 kDa	2.7763	2.3009	2.6387	3.6162					60S ribosomal protein L10a OS=Homo sapiens OX=9606 GN=RPL10A PE=1 SV=2
sp|P05387|RLA2_HUMAN	12 kDa	1.3881	0	0	0					60S acidic ribosomal protein P2 OS=Homo sapiens OX=9606 GN=RPLP2 PE=1 SV=1
sp|Q14444|CAPR1_HUMAN	78 kDa	2.0822	0	2.6387	0					Caprin-1 OS=Homo sapiens OX=9606 GN=CAPRIN1 PE=1 SV=2
sp|Q04837|SSBP_HUMAN	17 kDa	0	0	0	5.4243					Single-stranded DNA-binding protein, mitochondrial OS=Homo sapiens OX=9606 GN=SSBP1 PE=1 SV=1
sp|Q8NF50|DOCK8_HUMAN	239 kDa	2.7763	0	0	0					Dedicator of cytokinesis protein 8 OS=Homo sapiens OX=9606 GN=DOCK8 PE=1 SV=3
sp|P47755|CAZA2_HUMAN	33 kDa	4.1644	0	5.2773	0					F-actin-capping protein subunit alpha-2 OS=Homo sapiens OX=9606 GN=CAPZA2 PE=1 SV=3
sp|P23246|SFPQ_HUMAN	76 kDa	0	0	2.6387	0					Splicing factor, proline- and glutamine-rich OS=Homo sapiens OX=9606 GN=SFPQ PE=1 SV=2
sp|P62879|GBB2_HUMAN	37 kDa	2.0822	5.7524	0	0	X				Guanine nucleotide-binding protein G(I)/G(S)/G(T) subunit beta-2 OS=Homo sapiens OX=9606 GN=GNB2 PE=1 SV=3
sp|Q9HCE1|MOV10_HUMAN	114 kDa	2.0822	0	5.2773	0					Helicase MOV-10 OS=Homo sapiens OX=9606 GN=MOV10 PE=1 SV=2
sp|P12109|CO6A1_HUMAN	109 kDa	0	3.4514	3.5182	0					Collagen alpha-1(VI) chain OS=Homo sapiens OX=9606 GN=COL6A1 PE=1 SV=3
sp|P02452|CO1A1_HUMAN	139 kDa	0	0	3.5182	0					Collagen alpha-1(I) chain OS=Homo sapiens OX=9606 GN=COL1A1 PE=1 SV=5
sp|P14373|TRI27_HUMAN	58 kDa	4.1644	0	0	0					Zinc finger protein RFP OS=Homo sapiens OX=9606 GN=TRIM27 PE=1 SV=1
sp|Q16891|MIC60_HUMAN	84 kDa	0	0	6.1569	0					MICOS complex subunit MIC60 OS=Homo sapiens OX=9606 GN=IMMT PE=1 SV=1
sp|P49207|RL34_HUMAN	13 kDa	2.7763	0	1.7591	0					60S ribosomal protein L34 OS=Homo sapiens OX=9606 GN=RPL34 PE=1 SV=3
sp|P62263|RS14_HUMAN	16 kDa	0	3.4514	2.6387	0					40S ribosomal protein S14 OS=Homo sapiens OX=9606 GN=RPS14 PE=1 SV=3
sp|P20908|CO5A1_HUMAN	184 kDa	0	0	3.5182	0					Collagen alpha-1(V) chain OS=Homo sapiens OX=9606 GN=COL5A1 PE=1 SV=3
sp|Q12792|TWF1_HUMAN	40 kDa	3.4703	3.4514	2.6387	0					Twinfilin-1 OS=Homo sapiens OX=9606 GN=TWF1 PE=1 SV=3
sp|Q5JWF2|GNAS1_HUMAN	111 kDa	3.4703	0	0	0					Guanine nucleotide-binding protein G(s) subunit alpha isoforms XLas OS=Homo sapiens OX=9606 GN=GNAS PE=1 SV=2
sp|P27797|CALR_HUMAN	48 kDa	0	0	2.6387	0					Calreticulin OS=Homo sapiens OX=9606 GN=CALR PE=1 SV=1
sp|Q00577|PURA_HUMAN	35 kDa	2.0822	0	1.7591	0					Transcriptional activator protein Pur-alpha OS=Homo sapiens OX=9606 GN=PURA PE=1 SV=2
sp|Q13501|SQSTM_HUMAN	48 kDa	4.1644	0	0	0					Sequestosome-1 OS=Homo sapiens OX=9606 GN=SQSTM1 PE=1 SV=1
sp|P52943|CRIP2_HUMAN	22 kDa	1.3881	3.4514	0	0	X				Cysteine-rich protein 2 OS=Homo sapiens OX=9606 GN=CRIP2 PE=1 SV=1
sp|O43852|CALU_HUMAN	37 kDa	0	2.3009	2.6387	0					Calumenin OS=Homo sapiens OX=9606 GN=CALU PE=1 SV=2
sp|Q9BR76|COR1B_HUMAN	54 kDa	1.3881	0	1.7591	0					Coronin-1B OS=Homo sapiens OX=9606 GN=CORO1B PE=1 SV=1
sp|P62829|RL23_HUMAN	15 kDa	3.4703	4.6019	0	0	X				60S ribosomal protein L23 OS=Homo sapiens OX=9606 GN=RPL23 PE=1 SV=1
sp|P06576|ATPB_HUMAN	57 kDa	0	0	3.5182	0					ATP synthase subunit beta, mitochondrial OS=Homo sapiens OX=9606 GN=ATP5F1B PE=1 SV=3
sp|P07602|SAP_HUMAN	58 kDa	2.7763	0	0	0					Prosaposin OS=Homo sapiens OX=9606 GN=PSAP PE=1 SV=2
sp|Q9ULV4|COR1C_HUMAN	53 kDa	2.7763	4.6019	0	0	X				Coronin-1C OS=Homo sapiens OX=9606 GN=CORO1C PE=1 SV=1
sp|P14625|ENPL_HUMAN	92 kDa	0	0	4.3978	0					Endoplasmin OS=Homo sapiens OX=9606 GN=HSP90B1 PE=1 SV=1
sp|P10909|CLUS_HUMAN	52 kDa	1.3881	0	1.7591	0					Clusterin OS=Homo sapiens OX=9606 GN=CLU PE=1 SV=1
sp|P08670|VIME_HUMAN	54 kDa	0	0	8.7956	0					Vimentin OS=Homo sapiens OX=9606 GN=VIM PE=1 SV=4
sp|Q5T0W9|FA83B_HUMAN	115 kDa	2.7763	0	1.7591	0					Protein FAM83B OS=Homo sapiens OX=9606 GN=FAM83B PE=1 SV=1
sp|Q96IZ0|PAWR_HUMAN	37 kDa	2.0822	3.4514	0	0	X				PRKC apoptosis WT1 regulator protein OS=Homo sapiens OX=9606 GN=PAWR PE=1 SV=1
sp|P36578|RL4_HUMAN	48 kDa	0	2.3009	0	3.6162					60S ribosomal protein L4 OS=Homo sapiens OX=9606 GN=RPL4 PE=1 SV=5
sp|P61026|RAB10_HUMAN	23 kDa	2.7763	2.3009	0	0	X				Ras-related protein Rab-10 OS=Homo sapiens OX=9606 GN=RAB10 PE=1 SV=1
sp|P50914|RL14_HUMAN	23 kDa	0	0	2.6387	0					60S ribosomal protein L14 OS=Homo sapiens OX=9606 GN=RPL14 PE=1 SV=4
sp|P62826|RAN_HUMAN	24 kDa	0	0	3.5182	0					GTP-binding nuclear protein Ran OS=Homo sapiens OX=9606 GN=RAN PE=1 SV=3
sp|Q92499|DDX1_HUMAN	82 kDa	2.7763	0	2.6387	0					ATP-dependent RNA helicase DDX1 OS=Homo sapiens OX=9606 GN=DDX1 PE=1 SV=2
sp|P17858|PFKAL_HUMAN	85 kDa	2.0822	0	0	0					ATP-dependent 6-phosphofructokinase, liver type OS=Homo sapiens OX=9606 GN=PFKL PE=1 SV=6
sp|P60981|DEST_HUMAN	19 kDa	2.0822	0	3.5182	0					Destrin OS=Homo sapiens OX=9606 GN=DSTN PE=1 SV=3
sp|P61158|ARP3_HUMAN	47 kDa	0	2.3009	2.6387	0					Actin-related protein 3 OS=Homo sapiens OX=9606 GN=ACTR3 PE=1 SV=3
sp|Q14254|FLOT2_HUMAN	47 kDa	1.3881	0	0	0					Flotillin-2 OS=Homo sapiens OX=9606 GN=FLOT2 PE=1 SV=2
sp|P78527|PRKDC_HUMAN	469 kDa	2.0822	0	1.7591	0					DNA-dependent protein kinase catalytic subunit OS=Homo sapiens OX=9606 GN=PRKDC PE=1 SV=3
sp|P62244|RS15A_HUMAN	15 kDa	2.0822	2.3009	0	0	X				40S ribosomal protein S15a OS=Homo sapiens OX=9606 GN=RPS15A PE=1 SV=2
sp|Q00839|HNRPU_HUMAN	91 kDa	0	0	1.7591	0					Heterogeneous nuclear ribonucleoprotein U OS=Homo sapiens OX=9606 GN=HNRNPU PE=1 SV=6
sp|P06396|GELS_HUMAN	86 kDa	0	2.3009	0	3.6162					Gelsolin OS=Homo sapiens OX=9606 GN=GSN PE=1 SV=1
sp|P12004|PCNA_HUMAN	29 kDa	1.3881	0	2.6387	0					Proliferating cell nuclear antigen OS=Homo sapiens OX=9606 GN=PCNA PE=1 SV=1
sp|Q9Y3I0|RTCB_HUMAN	55 kDa	1.3881	2.3009	0	0	X				tRNA-splicing ligase RtcB homolog OS=Homo sapiens OX=9606 GN=RTCB PE=1 SV=1
sp|Q9NX63|MIC19_HUMAN	26 kDa	0	0	3.5182	0					MICOS complex subunit MIC19 OS=Homo sapiens OX=9606 GN=CHCHD3 PE=1 SV=1
sp|P62280|RS11_HUMAN	18 kDa	2.7763	2.3009	0	0	X				40S ribosomal protein S11 OS=Homo sapiens OX=9606 GN=RPS11 PE=1 SV=3
sp|P23526|SAHH_HUMAN	48 kDa	1.3881	0	1.7591	0					Adenosylhomocysteinase OS=Homo sapiens OX=9606 GN=AHCY PE=1 SV=4
sp|Q4KMQ1|TPRN_HUMAN	76 kDa	1.3881	2.3009	0	0	X				Taperin OS=Homo sapiens OX=9606 GN=TPRN PE=1 SV=2
sp|P08754|GNAI3_HUMAN	41 kDa	2.7763	0	0	0					Guanine nucleotide-binding protein G(k) subunit alpha OS=Homo sapiens OX=9606 GN=GNAI3 PE=1 SV=3
sp|P22314|UBA1_HUMAN	118 kDa	0	0	1.7591	0					Ubiquitin-like modifier-activating enzyme 1 OS=Homo sapiens OX=9606 GN=UBA1 PE=1 SV=3
sp|O00515|LAD1_HUMAN	57 kDa	1.3881	0	0	0					Ladinin-1 OS=Homo sapiens OX=9606 GN=LAD1 PE=1 SV=2
sp|O95793|STAU1_HUMAN	63 kDa	2.0822	0	0	0					Double-stranded RNA-binding protein Staufen homolog 1 OS=Homo sapiens OX=9606 GN=STAU1 PE=1 SV=2
sp|Q8IVT2|MISP_HUMAN	75 kDa	2.0822	0	0	0					Mitotic interactor and substrate of PLK1 OS=Homo sapiens OX=9606 GN=MISP PE=1 SV=1
sp|Q06787|FMR1_HUMAN	71 kDa	0	0	5.2773	0					Synaptic functional regulator FMR1 OS=Homo sapiens OX=9606 GN=FMR1 PE=1 SV=1
sp|O14686|KMT2D_HUMAN	593 kDa	1.3881	0	0	0					Histone-lysine N-methyltransferase 2D OS=Homo sapiens OX=9606 GN=KMT2D PE=1 SV=2
sp|P62753|RS6_HUMAN	29 kDa	1.3881	0	1.7591	0					40S ribosomal protein S6 OS=Homo sapiens OX=9606 GN=RPS6 PE=1 SV=1
sp|P35268|RL22_HUMAN	15 kDa	1.3881	0	0	0					60S ribosomal protein L22 OS=Homo sapiens OX=9606 GN=RPL22 PE=1 SV=2
sp|P07942|LAMB1_HUMAN	198 kDa	1.3881	0	0	0					Laminin subunit beta-1 OS=Homo sapiens OX=9606 GN=LAMB1 PE=1 SV=2
sp|O14818|PSA7_HUMAN	28 kDa	1.3881	0	1.7591	0					Proteasome subunit alpha type-7 OS=Homo sapiens OX=9606 GN=PSMA7 PE=1 SV=1
sp|P15880|RS2_HUMAN	31 kDa	0	0	0	3.6162					40S ribosomal protein S2 OS=Homo sapiens OX=9606 GN=RPS2 PE=1 SV=2
sp|P09871|C1S_HUMAN	77 kDa	1.3881	3.4514	0	0	X				Complement C1s subcomponent OS=Homo sapiens OX=9606 GN=C1S PE=1 SV=1
sp|O43707|ACTN4_HUMAN	105 kDa	6.9406	0	8.7956	0					Alpha-actinin-4 OS=Homo sapiens OX=9606 GN=ACTN4 PE=1 SV=2
sp|Q9P258|RCC2_HUMAN	56 kDa	2.7763	0	1.7591	0					Protein RCC2 OS=Homo sapiens OX=9606 GN=RCC2 PE=1 SV=2
sp|Q13310|PABP4_HUMAN	71 kDa	0	0	6.1569	0					Polyadenylate-binding protein 4 OS=Homo sapiens OX=9606 GN=PABPC4 PE=1 SV=1
sp|P02786|TFR1_HUMAN	85 kDa	2.0822	0	0	0					Transferrin receptor protein 1 OS=Homo sapiens OX=9606 GN=TFRC PE=1 SV=2
sp|Q9Y5S2|MRCKB_HUMAN	194 kDa	2.7763	0	0	0					Serine/threonine-protein kinase MRCK beta OS=Homo sapiens OX=9606 GN=CDC42BPB PE=1 SV=2
sp|Q9H074|PAIP1_HUMAN	54 kDa	2.0822	0	1.7591	0					Polyadenylate-binding protein-interacting protein 1 OS=Homo sapiens OX=9606 GN=PAIP1 PE=1 SV=1
sp|P62851|RS25_HUMAN	14 kDa	2.0822	0	0	0					40S ribosomal protein S25 OS=Homo sapiens OX=9606 GN=RPS25 PE=1 SV=1
sp|Q8NFJ5|RAI3_HUMAN	40 kDa	1.3881	0	0	0					Retinoic acid-induced protein 3 OS=Homo sapiens OX=9606 GN=GPRC5A PE=1 SV=2
sp|Q9UJS0|CMC2_HUMAN	74 kDa	2.0822	0	0	0					Calcium-binding mitochondrial carrier protein Aralar2 OS=Homo sapiens OX=9606 GN=SLC25A13 PE=1 SV=2
sp|P27348|1433T_HUMAN	28 kDa	0	4.6019	0	0					14-3-3 protein theta OS=Homo sapiens OX=9606 GN=YWHAQ PE=1 SV=1
sp|P02794|FRIH_HUMAN	21 kDa	0	4.6019	0	0					Ferritin heavy chain OS=Homo sapiens OX=9606 GN=FTH1 PE=1 SV=2
sp|O00571|DDX3X_HUMAN	73 kDa	2.7763	0	0	0					ATP-dependent RNA helicase DDX3X OS=Homo sapiens OX=9606 GN=DDX3X PE=1 SV=3
sp|Q1ED39|KNOP1_HUMAN	52 kDa	0	0	0	3.6162					Lysine-rich nucleolar protein 1 OS=Homo sapiens OX=9606 GN=KNOP1 PE=1 SV=1
sp|P51153|RAB13_HUMAN	23 kDa	2.7763	0	0	0					Ras-related protein Rab-13 OS=Homo sapiens OX=9606 GN=RAB13 PE=1 SV=1
sp|P07910|HNRPC_HUMAN	34 kDa	0	0	1.7591	0					Heterogeneous nuclear ribonucleoproteins C1/C2 OS=Homo sapiens OX=9606 GN=HNRNPC PE=1 SV=4
sp|P0DOX6|IGM_HUMAN	63 kDa	0	2.3009	0	0					Immunoglobulin mu heavy chain OS=Homo sapiens OX=9606 PE=1 SV=2
sp|P21291|CSRP1_HUMAN	21 kDa	0	2.3009	0	0					Cysteine and glycine-rich protein 1 OS=Homo sapiens OX=9606 GN=CSRP1 PE=1 SV=3
sp|Q14694|UBP10_HUMAN	87 kDa	2.0822	0	0	0					Ubiquitin carboxyl-terminal hydrolase 10 OS=Homo sapiens OX=9606 GN=USP10 PE=1 SV=2
sp|P61981|1433G_HUMAN	28 kDa	3.4703	0	0	0					14-3-3 protein gamma OS=Homo sapiens OX=9606 GN=YWHAG PE=1 SV=2
sp|Q9H3F6|BACD3_HUMAN	35 kDa	2.0822	0	0	0					BTB/POZ domain-containing adapter for CUL3-mediated RhoA degradation protein 3 OS=Homo sapiens OX=9606 GN=KCTD10 PE=1 SV=1
sp|P10599|THIO_HUMAN	12 kDa	0	0	0	5.4243					Thioredoxin OS=Homo sapiens OX=9606 GN=TXN PE=1 SV=3
sp|P11586|C1TC_HUMAN	102 kDa	2.0822	0	0	0					C-1-tetrahydrofolate synthase, cytoplasmic OS=Homo sapiens OX=9606 GN=MTHFD1 PE=1 SV=3
sp|O43684|BUB3_HUMAN	37 kDa	0	0	2.6387	0					Mitotic checkpoint protein BUB3 OS=Homo sapiens OX=9606 GN=BUB3 PE=1 SV=1
sp|P53814|SMTN_HUMAN	99 kDa	2.7763	0	0	0					Smoothelin OS=Homo sapiens OX=9606 GN=SMTN PE=1 SV=7
sp|P40429|RL13A_HUMAN	24 kDa	0	0	0	3.6162					60S ribosomal protein L13a OS=Homo sapiens OX=9606 GN=RPL13A PE=1 SV=2
sp|Q9HCH5|SYTL2_HUMAN	105 kDa	1.3881	0	0	0					Synaptotagmin-like protein 2 OS=Homo sapiens OX=9606 GN=SYTL2 PE=1 SV=3
sp|P00403|COX2_HUMAN	26 kDa	0	0	1.7591	0					Cytochrome c oxidase subunit 2 OS=Homo sapiens OX=9606 GN=MT-CO2 PE=1 SV=1
sp|P30041|PRDX6_HUMAN	25 kDa	0	0	1.7591	0					Peroxiredoxin-6 OS=Homo sapiens OX=9606 GN=PRDX6 PE=1 SV=3
sp|P25205|MCM3_HUMAN	91 kDa	0	0	1.7591	0					DNA replication licensing factor MCM3 OS=Homo sapiens OX=9606 GN=MCM3 PE=1 SV=3
sp|P05090|APOD_HUMAN	21 kDa	0	0	0	5.4243					Apolipoprotein D OS=Homo sapiens OX=9606 GN=APOD PE=1 SV=1
sp|Q9UPQ0|LIMC1_HUMAN	122 kDa	1.3881	0	0	0					LIM and calponin homology domains-containing protein 1 OS=Homo sapiens OX=9606 GN=LIMCH1 PE=1 SV=4
sp|P08865|RSSA_HUMAN	33 kDa	2.0822	0	0	0					40S ribosomal protein SA OS=Homo sapiens OX=9606 GN=RPSA PE=1 SV=4
sp|P50454|SERPH_HUMAN	46 kDa	0	0	1.7591	0					Serpin H1 OS=Homo sapiens OX=9606 GN=SERPINH1 PE=1 SV=2
sp|O43809|CPSF5_HUMAN	26 kDa	0	0	1.7591	0					Cleavage and polyadenylation specificity factor subunit 5 OS=Homo sapiens OX=9606 GN=NUDT21 PE=1 SV=1
sp|P17987|TCPA_HUMAN	60 kDa	1.3881	0	0	0					T-complex protein 1 subunit alpha OS=Homo sapiens OX=9606 GN=TCP1 PE=1 SV=1
sp|Q53EZ4|CEP55_HUMAN	54 kDa	1.3881	0	0	0					Centrosomal protein of 55 kDa OS=Homo sapiens OX=9606 GN=CEP55 PE=1 SV=3
sp|O95425|SVIL_HUMAN	248 kDa	1.3881	0	0	0					Supervillin OS=Homo sapiens OX=9606 GN=SVIL PE=1 SV=2
sp|Q6P1M3|L2GL2_HUMAN	113 kDa	1.3881	0	0	0					Lethal(2) giant larvae protein homolog 2 OS=Homo sapiens OX=9606 GN=LLGL2 PE=1 SV=2
sp|Q15233|NONO_HUMAN	54 kDa	0	0	2.6387	0					Non-POU domain-containing octamer-binding protein OS=Homo sapiens OX=9606 GN=NONO PE=1 SV=4
sp|Q99497|PARK7_HUMAN	20 kDa	0	0	1.7591	0					Protein/nucleic acid deglycase DJ-1 OS=Homo sapiens OX=9606 GN=PARK7 PE=1 SV=2
sp|Q96RQ3|MCCA_HUMAN	80 kDa	1.3881	0	0	0					Methylcrotonoyl-CoA carboxylase subunit alpha, mitochondrial OS=Homo sapiens OX=9606 GN=MCCC1 PE=1 SV=3
sp|P09874|PARP1_HUMAN	113 kDa	1.3881	0	0	0					Poly [ADP-ribose] polymerase 1 OS=Homo sapiens OX=9606 GN=PARP1 PE=1 SV=4
sp|Q13618|CUL3_HUMAN	89 kDa	1.3881	0	0	0					Cullin-3 OS=Homo sapiens OX=9606 GN=CUL3 PE=1 SV=2

## Sheet: Table S2
GO TERM	ASPECT	FDR
actin filament depolymerization (GO:0030042)	BP	0.000997
regulation of dendrite morphogenesis (GO:0048814)	BP	0.0124
DNA strand elongation involved in DNA replication (GO:0006271)	BP	0.015
regulation of synapse organization (GO:0050807)	BP	0.0174
dendrite morphogenesis (GO:0048813)	BP	0.02
regulation of dendrite development (GO:0050773)	BP	0.0247
negative regulation of actin filament polymerization (GO:0030837)	BP	0.00811
regulation of cell projection assembly (GO:0060491)	BP	0.0386
regulation of synapse structure or activity (GO:0050803)	BP	0.0429
regulation of mRNA stability (GO:0043488)	BP	0.0479
regulation of RNA stability (GO:0043487)	BP	0.0473
protein depolymerization (GO:0051261)	BP	0.0183
ribosomal large subunit biogenesis (GO:0042273)	BP	0.000453
regulation of alternative mRNA splicing, via spliceosome (GO:0000381)	BP	0.029
alternative mRNA splicing, via spliceosome (GO:0000380)	BP	0.0312
regulation of actin filament organization (GO:0110053)	BP	0.000316
cellular protein complex disassembly (GO:0043624)	BP	0.0329
regulation of actin filament polymerization (GO:0030833)	BP	0.00109
cytoplasmic translation (GO:0002181)	BP	0.0124
regulation of actin filament length (GO:0030832)	BP	0.00123
regulation of actin polymerization or depolymerization (GO:0008064)	BP	0.00119
actin filament polymerization (GO:0030041)	BP	0.00124
regulation of protein polymerization (GO:0032271)	BP	0.0014
regulation of mRNA splicing, via spliceosome (GO:0048024)	BP	0.0156
actin polymerization or depolymerization (GO:0008154)	BP	0.0016
regulation of supramolecular fiber organization (GO:1902903)	BP	0.000654
negative regulation of organelle organization (GO:0010639)	BP	0.00577
protein polymerization (GO:0051258)	BP	0.00307
regulation of RNA splicing (GO:0043484)	BP	0.0237
regulation of cellular component biogenesis (GO:0044087)	BP	7.2e-05
regulation of mRNA processing (GO:0050684)	BP	0.0256
actin filament organization (GO:0007015)	BP	3.27e-05
regulation of actin cytoskeleton organization (GO:0032956)	BP	0.00139
regulation of actin filament-based process (GO:0032970)	BP	0.00143
regulation of protein complex assembly (GO:0043254)	BP	0.00437
actin cytoskeleton organization (GO:0030036)	BP	5.85e-07
actin filament-based process (GO:0030029)	BP	7.4e-07
regulation of cellular component size (GO:0032535)	BP	0.00739
negative regulation of cellular component organization (GO:0051129)	BP	0.0201
supramolecular fiber organization (GO:0097435)	BP	8.14e-06
ribosome biogenesis (GO:0042254)	BP	0.000306
posttranscriptional regulation of gene expression (GO:0010608)	BP	0.0235
regulation of cytoskeleton organization (GO:0051493)	BP	0.00186
regulation of anatomical structure size (GO:0090066)	BP	0.0125
translational elongation (GO:0006414)	BP	0.000111
translation (GO:0006412)	BP	0.000104
peptide biosynthetic process (GO:0043043)	BP	0.000112
negative regulation of cellular protein metabolic process (GO:0032269)	BP	0.0204
negative regulation of protein metabolic process (GO:0051248)	BP	0.0227
amide biosynthetic process (GO:0043604)	BP	0.000328
peptide metabolic process (GO:0006518)	BP	0.000266
ribonucleoprotein complex biogenesis (GO:0022613)	BP	0.00251
mRNA splicing, via spliceosome (GO:0000398)	BP	0.0389
RNA splicing, via transesterification reactions with bulged adenosine as nucleophile (GO:0000377)	BP	0.0383
RNA splicing, via transesterification reactions (GO:0000375)	BP	0.0377
RNA splicing (GO:0008380)	BP	0.0213
cellular protein-containing complex assembly (GO:0034622)	BP	0.000109
protein-containing complex assembly (GO:0065003)	BP	7.32e-05
cytoskeleton organization (GO:0007010)	BP	8.63e-07
mRNA processing (GO:0006397)	BP	0.04
cellular amide metabolic process (GO:0043603)	BP	0.00183
protein-containing complex subunit organization (GO:0043933)	BP	0.000174
regulation of organelle organization (GO:0033043)	BP	0.0204
cellular component biogenesis (GO:0044085)	BP	2.51e-07
cellular component assembly (GO:0022607)	BP	4.62e-06
RNA processing (GO:0006396)	BP	0.0202
regulation of cellular component organization (GO:0051128)	BP	0.0321
organelle organization (GO:0006996)	BP	2.37e-06
organonitrogen compound biosynthetic process (GO:1901566)	BP	0.0389
cellular component organization or biogenesis (GO:0071840)	BP	4.55e-07
cellular component organization (GO:0016043)	BP	7.82e-06
negative regulation of biological process (GO:0048519)	BP	0.0495
cellular process (GO:0009987)	BP	0.016
structural constituent of ribosome (GO:0003735)	MF	1.25e-16
rRNA binding (GO:0019843)	MF	0.00642
mRNA 3'-UTR binding (GO:0003730)	MF	0.0127
single-stranded RNA binding (GO:0003727)	MF	0.0119
structural molecule activity (GO:0005198)	MF	6.61e-17
actin filament binding (GO:0051015)	MF	2.27e-06
actin binding (GO:0003779)	MF	8.35e-06
protein-containing complex binding (GO:0044877)	MF	2.23e-06
RNA binding (GO:0003723)	MF	4.18e-12
mRNA binding (GO:0003729)	MF	0.00415
cytoskeletal protein binding (GO:0008092)	MF	6.82e-06
nucleic acid binding (GO:0003676)	MF	4.98e-08
heterocyclic compound binding (GO:1901363)	MF	1.93e-07
organic cyclic compound binding (GO:0097159)	MF	2.89e-07
binding (GO:0005488)	MF	1.51e-09
protein binding (GO:0005515)	MF	0.0279
molecular_function (GO:0003674)	MF	6.44e-05
Unclassified (UNCLASSIFIED)	MF	6.98e-05
molecular transducer activity (GO:0060089)	MF	0.013
signaling receptor activity (GO:0038023)	MF	0.0278
growth cone (GO:0030426)	CC	0.0347
actin cortical patch (GO:0030479)	CC	0.000572
site of polarized growth (GO:0030427)	CC	0.00572
cytosolic small ribosomal subunit (GO:0022627)	CC	3.57e-08
cytosolic ribosome (GO:0022626)	CC	3.36e-18
cytosolic large ribosomal subunit (GO:0022625)	CC	1.26e-10
cytoplasmic stress granule (GO:0010494)	CC	0.00926
collagen trimer (GO:0005581)	CC	0.0104
small ribosomal subunit (GO:0015935)	CC	3.21e-07
ribosomal subunit (GO:0044391)	CC	2.7e-16
large ribosomal subunit (GO:0015934)	CC	3.31e-09
cortical actin cytoskeleton (GO:0030864)	CC	8.29e-05
ribosome (GO:0005840)	CC	6.8e-16
cytosolic part (GO:0044445)	CC	3.45e-17
cortical cytoskeleton (GO:0030863)	CC	0.000134
cytoplasmic ribonucleoprotein granule (GO:0036464)	CC	1.61e-05
ribonucleoprotein granule (GO:0035770)	CC	1.56e-05
actin cytoskeleton (GO:0015629)	CC	1.72e-09
actin filament (GO:0005884)	CC	0.000213
collagen-containing extracellular matrix (GO:0062023)	CC	0.00149
cell cortex part (GO:0044448)	CC	0.000754
ribonucleoprotein complex (GO:1990904)	CC	4.77e-18
cell cortex (GO:0005938)	CC	0.00362
supramolecular fiber (GO:0099512)	CC	4.04e-07
supramolecular polymer (GO:0099081)	CC	4.45e-07
supramolecular complex (GO:0099080)	CC	4.27e-07
extracellular matrix (GO:0031012)	CC	0.00213
polymeric cytoskeletal fiber (GO:0099513)	CC	0.000181
cytoplasmic region (GO:0099568)	CC	0.00213
cytoskeletal part (GO:0044430)	CC	4.92e-08
intracellular non-membrane-bounded organelle (GO:0043232)	CC	1.83e-18
non-membrane-bounded organelle (GO:0043228)	CC	1.22e-18
cytosol (GO:0005829)	CC	2.47e-09
cytoskeleton (GO:0005856)	CC	7.54e-08
protein-containing complex (GO:0032991)	CC	1.66e-09
intracellular organelle part (GO:0044446)	CC	4.89e-07
organelle part (GO:0044422)	CC	6.64e-07
cytoplasmic part (GO:0044444)	CC	3.92e-07
extracellular region (GO:0005576)	CC	0.0372
extracellular region part (GO:0044421)	CC	0.0365
cytoplasm (GO:0005737)	CC	1.69e-08
intracellular organelle (GO:0043229)	CC	8.56e-09
organelle (GO:0043226)	CC	1.83e-08
intracellular part (GO:0044424)	CC	3.82e-08
intracellular (GO:0005622)	CC	4.03e-08
cellular_component (GO:0005575)	CC	9.11e-06
cell part (GO:0044464)	CC	0.0015
cell (GO:0005623)	CC	0.00146
Unclassified (UNCLASSIFIED)	CC	9.43e-06
integral component of membrane (GO:0016021)	CC	0.00946
intrinsic component of membrane (GO:0031224)	CC	0.00936
intrinsic component of plasma membrane (GO:0031226)	CC	0.0232
integral component of plasma membrane (GO:0005887)	CC	0.0362
BP = Biological Process, MF = Molecular Function, CC = Cellular Component
